# Supplementary material for: Dynamics and thin film drainage of a deformable droplet moving towards a solid wall with finite inertia
Source: Royal Society of Chemistry journal article supplement (doi:10.1039/c1ra01108a), 2012-01-01
Supplement: c1ra01108a.pdf [file c1ra01108a.pdf]

## Electronic Supplementary Information for Publication

Dynamics and thin film drainage of a deformable droplet moving  
toward a solid wall with finite inertia

Shaoping Quan

Institute of High Performance Computing

1 Fusionopolis Way, #16-16 Connexis, Singapore 138632

In the submitted movie file (DropSubstrateLHO-HSL.mp4), the animation for the head-on approaching with  $Re=25$ ,  $We=0.125$ ,  $Ca=0.005$  is presented first, and then the animation of the oblique approaching with  $Re=50$ ,  $We=0.5$ ,  $Ca=0.01$ . In the movie, the blue mesh denotes the droplet, and the red mesh stands for the surrounding phase. The detailed view of the thin film thinning and the mesh adaptation near this region is displayed in the zoomed-in-view window.
